# Supplementary material
Source: Springer Nature journal article supplement (https://www.springermedizin.de/resource/supplementary/13000_2013_771_MOESM1_ESM.pdf/9625468)

wild type

T G T T A C G G A C A T A

cutaneous  
melanoma

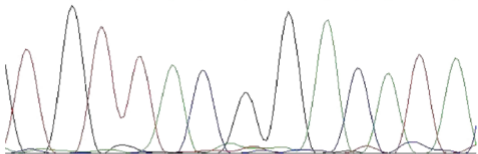

uveal  
melanoma

T G T T A C G G A C A T A

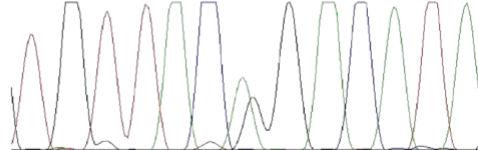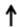

mutation c.1873C>T (p.R625C)

Supplement: MOESM1 [file 9625468]
